# Supplementary material for: A single-step high-throughput bioassay for quantifying Fc-containing recombinant proteins based on non-classical calculation of fluorescence polarization
Source: Royal Society of Chemistry journal article supplement (doi:10.1039/d4ay00372a), 2024-01-01
Supplement: d4ay00372a1.pdf [file d4ay00372a1.pdf]

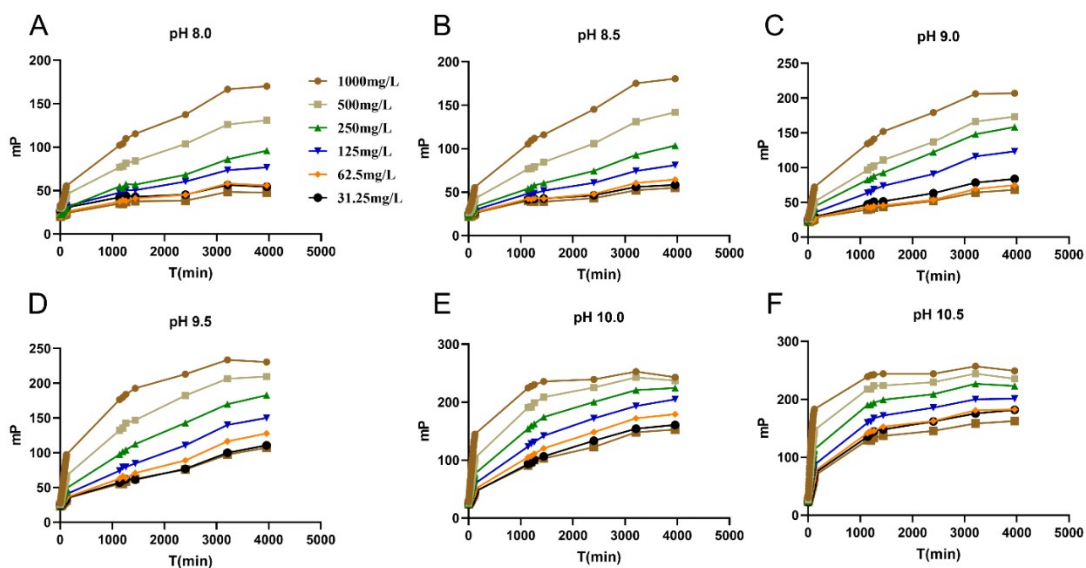

**Extended Data Fig.1**

**Comparison of the Effects of Different Protein Concentrations and pH on the Coupling Reaction by Real-Time FP Detection.** (A)-(F) Fluorescence polarization changes over time during the coupling reaction at pH values of 8.0(A), 8.5(B), 9.0(C), 9.5(D), 10.0(E), and 10.5(F).

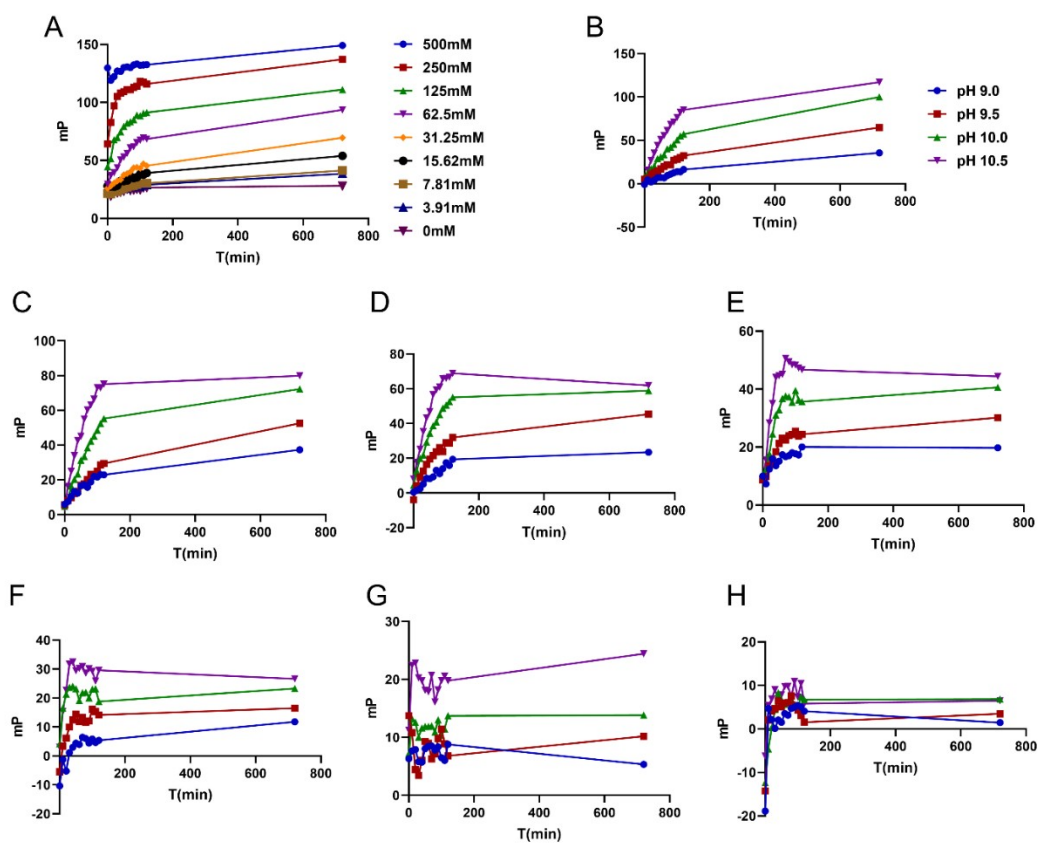

### Extended Data Fig.2

#### Imidazole Effects on the Coupling Reaction and Fluorescence Polarization.

(A) Fluorescence polarization changes of FITC in the absence or with gradient imidazole concentrations over time. (B)-(H) Fluorescence polarization changes during FITC-proteins coupling reaction in the absence (B) or with different imidazole concentrations (15.62mM, 31.5mM, 62.5mM, 125mM, 250mM, and 500mM, respectively) over time.
